# Supplementary material
Source: PubMed Central journal article supplement (PMC2793740)
Supplement: supp_3_2_79__1.pdf [file supp_3_2_79__1.pdf]

**Workforce in Oncology Task Force**  
**Committee 2006/2007**

**Michael Goldstein, MD**

**Chair**

Beth Israel Deaconess Medcl Ctr

330 Brookline Ave

Boston, MA 02215

Phone: (617) 667-4852

Fax: (617) 975-5665

Email: mgoldst3@bidmc.harvard.edu

Specialty: Med Onc

Cmte Term: 2003-2010

Assistant: Maxine Joyner

Assistant email: mjoyner@bidmc.harvard.edu

**James L. Abbruzzese, MD**

**Cancer Research Committee Liaison**

UT MD Anderson Cancer Ctr

Dept of GI Med

1515 Holcombe Blvd

Unit 426

Houston, TX 77030-4009

Phone: (713) 792-2828

Fax: (713) 745-1163

Email: jabbruzz@mdanderson.org

Specialty: Med Onc

Cmte Term: 2003-2010

Assistant: Anne M. LeBourgeois

Assistant email: alebourg@mdanderson.org

**Maria Quintos Baggstrom, MD**

Washington Univ School of Medcn

660 South Euclid

Box 8056

ST Louis MO 63110

Phone: 341-362-5740

Fax: 314-362-7086

Email: mbaggstr@im.wustl.edu

**Dean Bajorin, MD**

Memor Sloan Kettering Cancer Ctr

1275 York Ave

New York, NY 10021-6007

Phone: (646) 422-4333

Fax: (212) 988-1079

Email: bajorind@MSKCC.ORG

Specialty: Med Onc

Cmte Term: 2003-2010

Assistant: Laura Samuels

Assistant email: samuelsl@mskcc.org

**Lodovico Balducci, MD**

H Lee Moffitt Cancer Ctr and Rsrch Inst

12902 Magnolia Dr

Tampa, FL 33612-9416

Phone: (813) 979-3822

Fax: (813) 972-8359

Email: balducci@moffitt.usf.edu

Specialty: Med Onc/Hem

Cmte Term: 2003-2010

Assistant: Anita Klamo

Assistant email: klamo@moffitt.usf.edu

**Diane C. Bodurka, MD**

**Health Services Committee Liaison**

UT MD Anderson Cancer Ctr

PO Box 301439

Houston, TX 77230-1439

Phone: (713) 745-3358

Fax: (713) 792-7586

Cmte Term: 2003-2010

Email: dcbodurka@mdanderson.org

Assistant: Lori Smith

Assistant email: lfsmith@mdanderson.org

**Jay L. Bosworth, MD**  
LI Rad Thrpy  
1129 Northern Blvd  
Manhasset, NY 11030  
Phone: (516) 365-6544  
Fax: (516) 365-6546  
Cmte Term: 2003-2010  
Email: jbosworth@NRAD.com  
Assistant: Andrea

**Craig Earle, MD**  
**Health Services Committee Liaison**  
Dana Farber Cancer Inst  
223 Beverly Rd  
Chestnut Hill, MA 02467-3158  
Phone: (617) 632-5564  
Fax: (617) 632-2270  
Email: craig\_earle@dfci.harvard.edu  
Assistant: Barry Schroeder  
Specialty: Med Onc  
Assistant email: bschroeder@partners.org

**Peter D. Byeff, MD**  
Bradley Medical Bldg.  
55 Meriden Ave., Suite 1A  
Southington, CT 06489-3237  
Phone: 860/621-9316  
Fax: 860/620-5526  
Email: pdbmdct2@aol.com  
Cmte Term: 2003-2010

**Peter Carroll, MD**  
**Cancer Research Committee Liaison**  
UCSF Comp Cancer Ctr  
1600 Divisadero St  
6th Fl Box 1695  
San Francisco, CA 94115  
Phone: (415) 353-7098  
Fax: (415) 353-9932  
Email: pcarroll@urol.ucsf.edu  
Specialty: Other  
Cmte Term: 2004-2007  
Assistant: Joanne Deming  
Assistant email: jdeming@urol.ucsf.edu

**Hedy Lee Kindler, MD**  
**Cancer Research Committee Liaison**  
Univ of Chicago  
5841 S Maryland Ave MC 2115  
Chicago, IL 60637-1470  
Phone: (773) 702-0360  
Fax: (773) 702-0963  
mail: hkindler@medicine.bsd.uchicago.edu  
Specialty: Med Onc  
Cmte Term: 2003-2010  
Assistant: Lisa Edge  
Assistant email: ledge@medicine.bsd.uchicago.edu

**Richard (Buz) A. Cooper, MD**  
Leonard Davis Institute of Health Economics  
University of Pennsylvania  
3641 Locust Walk, Suite 314  
Philadelphia, PA 19104-6218  
Phone: (215) 746-3173  
Fax: (215) 898-0229  
Cmte Term: 2003-2010  
Email: [cooperra@wharton.upenn.edu](mailto:cooperra@wharton.upenn.edu)

**Nancy Renee Feldman, MD**  
**Oncology Training Program Liaison**  
Olive View UCLA Med Ctr  
Dept of Medcn  
14445 Olive View Dr  
Rm 2B182  
Sylmar, CA 91342-1437  
Phone: (818) 364-3205  
Fax: (818) 364-4573  
Email: feldwein@aol.com  
Specialty: Med Onc  
Cmte Term: 2004-2010

**Dean H. Gesme, MD**  
**Clinical Practice Committee Liaison**  
Minnesota Hematology Oncology PA  
Piper Bldg Ste 405  
800 East 28th St  
Minneapolis, MN 55407-3799  
Phone: (612) 863-8585  
Fax: (612) 863-8586  
Email: dean.gesme@usoncology.com  
Specialty: Med Onc  
Cmte Term: 2003-2010  
Assistant: Carole Dzingle

**Robert J. Mayer, MD**  
**Cancer Communications Committee Liaison**  
Dana Farber Cancer Inst  
44 Binney St Rm 1608  
Boston, MA 02115-6084  
Phone: (617) 632-3474  
Fax: (617) 632-2260  
Email: robert\_mayer@dfci.harvard.edu  
Specialty: Med Onc/Hem  
Cmte Term: 2003-2010  
Assistant: Kim Bremner  
Assistant email: kim\_bremner@dfci.harvard.edu

**Stephanie Lee, MD, MPH**  
**Health Services Committee Liaison**  
Fred Hutchinson Cancer Rsrch Ct R  
1100 Fairview Ave N D5-290  
PO Box 19024  
Seattle, WA 98109  
Phone: (206) 667-5160  
Fax: (206) 667-1034  
Email: sjlee@fhcrc.org  
Specialty: Med Onc/Hem  
Cmte Term: 2003-2010

**David Mendelson, MD**  
**Health Services Committee Liaison**  
Premiere Onc  
9023 E Desert Cove Dr  
Ste 101  
Scottsdale, AZ 85260  
Phone: (480) 860-5000  
Fax: (480) 314-0033  
Email: dmendelson@premiereoncology.com  
Specialty: Med Onc/Hem  
Cmte Term: 2003-2010

**Lawrence S. Lessin, MD**  
Washington Cancer Inst  
Washington Hospital Center  
110 Irving St NW  
Washington, DC 20010-2931  
Phone: (202) 877-8112  
Fax: (202) 877-8086  
Email: lawrence.lessin@medstar.net  
Specialty: Med Onc/Hem  
Cmte Term: 2003-2010  
Assistant: Judith Meinster  
Assistant email: judith.meinster@medstar.net

**Tracey O Connor, MD**  
Department of Medicine  
Roswell Park Cancer Institute  
Elm & Carlton Streets  
Buffalo, NY 14269  
Phone: (716) 845-1742  
Fax: (716) 845-8008  
Email: tracey.oconnor@roswellpark.org  
Cmte Term: 2006-2010  
Assistant: Karen Kennedy  
Asst email: Karen.kennedy@roswellpark.org

**Robert F. Ozols, MD, PhD**  
**Cancer Research Committee Liaison**  
Fox Chase Cancer Ctr  
333 Cottman Ave  
Philadelphia, PA 19111-2497  
Phone: (215) 728-2673  
Fax: (215) 728-5346  
Email: robert.ozols@fccc.edu  
Specialty: Med Onc  
Cmte Term: 2003-2010  
Assistant: Connie Terzyk  
Assistant email: C\_Terzyk@fccc.edu

**Jennifer Schwartz, MD, FRCPC**  
**Career Development Committee Liaison**  
Indiana Univ  
Internal Medicine/Hem-Oncology  
RT-473  
535 Barnhill Dr  
Indianapolis, IN 46202  
Phone: (317) 278-7576  
Fax: (317) 274-3646  
Email: jeschwar@iupui.edu  
Specialty: Hem  
Cmte Term: 2004-2010  
Assistant: Laurie Carlson  
Assistant email: lscarlso@iupui.edu

**Lisa S. Rome, MD**  
**Cancer Research Committee Liaison**  
VA CT Health Care Syst  
80 North Ave  
Westport, CT 06880  
Phone: (203) 937-3421  
Fax: (203) 937-3803  
Email: lsromemd@worldnet.att.net  
Specialty: Med Onc  
Cmte Term: 2004-2010  
Assistant: Edna McCarthy  
Assistant email: edna.mccarthy@med.va.gov  
Oncology and

**Douglas J. Scothorn, MD, PhD**  
**Career Development Committee Liaison**  
Mission Children's Clinic  
Pediatric Hematology-Oncology  
11 Vanderbilt Park Drive  
Asheville, NC 28801 USA  
Phone: 828.213.5770  
Fax: 828.213.5771  
Email: douglas.scothorn@msj.org \*  
Specialty: Pediatrics (including Pediatric  
Pediatric Specialties)  
Specialty: Med Onc/Hem  
Cmte Term: 2003-2010  
Assistant: Nancy Frost

**Visaharan Sivasubramaniam, MD**

Univ of KY Sect of Hem/Onc  
1380 Hwy 192 E  
London, KY 40741-1074  
Phone: (606) 862-0605  
Fax: (650) 595-2943  
Email: drvisa@pol.net  
Specialty: Med Onc  
Cmte Term: 2003-2010

**Samuel M Silver, MD, PhD, FACP**

Univ of Michigan  
Division of Hematology & Oncology  
B1-207 Cancer Ctr  
Ann Arbor, MI 48109-0914  
Phone: 734-936-8785  
Fax: 734-936-8788  
Email: msilver@umich.edu

**Christopher Willett, MD****Cancer Research Committee Liaison**

Duke Univ Medcl Ctr  
Dept of Rad Onc  
Box 3085  
Durham, NC 27710  
Phone: (919) 668-5640  
Fax: (919) 668-7345  
Email: willett@radonc.duke.edu  
Specialty: Rad Onc  
Cmte Term: 2003-2010  
Assistant: Donna Wimberley  
Assistant email: dwimber@radonc.duke.edu

**Antonio C. Wolff, MD, FACP****Health Services Committee Liaison**

Johns Hopkins Kimmel Cancer Ct  
Associate Professor of Oncology  
Breast Cancer Program  
1650 Orleans St  
CRB 189  
Baltimore, MD 21231-1000  
Phone: (410) 614-4192  
Fax: (410) 955-0125  
Email: awolff@jhmi.edu  
Specialty: Med Onc  
Cmte Term: 2003-201  
Assistant: Vanessa Ogle  
Assistant email: vogle1@jhmi.edu

**Gaetano Forte****Ex-Officio**

Center for Health Workforce Studies  
Director of Information Management  
1 University Place  
Suite B334  
Rensselaer, NY 12144  
Phone: 518/402-0250  
Fax: 518/402-0252  
Email: gjf01@health.state.ny.us  
Cmte Term: 2004-2010

**Edward Salsberg, MBA****Ex-Officio**

Association of American Medical Colleges  
Director  
Center for Workforce Studies  
2450 N St. N.W.  
Washington, DC 20037  
Phone: (202) 828-0415  
Fax: (202)828-1125  
Email: esalsberg@aamc.org

**Clese Erikson****Ex-Officio**

Association of American Medical Colleges  
Senior Research Associate  
Center for Workforce Studies  
2450 N St. N.W.  
Washington, DC 20037  
Phone: (202) 828-0415  
Fax: (202)828-1125  
Email: ckerikson@aamc.org

**Joseph S. Bailes, MD****Staff**

ASCO  
Interim EVP & CEO  
1900 Duke Street  
Suite 200  
Alexandria VA 22314  
Phone: 703-299-0150  
Fax: (703) 684-6062  
Email: bailesj@asco.org  
Cmte Term: 2003-2010

**Suanna Bruinooge****Staff**

ASCO  
Senior Policy Analyst  
Cancer Research Division  
1900 Duke Street  
Suite 200  
Alexandria, VA 22314  
Phone: 703-299-1050  
Fax: 703-684-8364  
Email: BRUINOOS@asco.org  
Cmte Term: 2003-2010

**Karen McCaffrey****Staff**

ASCO  
Program Administrator  
Education, Science, and Career Development  
1900 Duke Street, Suite 200  
Alexandria, VA 22314  
Phone: (703) 299-1071  
Fax: (703) 684-5482  
Email: MCCAFFRK@asco.org  
Cmte Term: 2004-2010

**Nancy Riese Daly, MS, MPH****Staff**

ASCO  
Director  
Cancer Research Division  
1900 Duke Street  
Suite 200  
Alexandria, VA 22314  
Phone: 703-299-1050  
Fax: 703-684-8364  
Email: dalyn@asco.org  
Cmte Term: 2003-201

**Chelsey Kelly****Staff**

ASCO  
Program Assistant  
Cancer Research Division  
1900 Duke Street  
Suite 200  
Alexandria, VA 22314  
Phone: 703-519-2942  
Fax: 703-684-8364  
Email: kellyc@asco.org
